# Supplementary material for: G6PD is a prognostic biomarker correlated with immune infiltrates in lung adenocarcinoma and pulmonary arterial hypertension
Source: Aging (Albany NY). 2024 Jan 8;16(1):466–92. doi: 10.18632/aging.205381 (PMC10817399; doi:10.18632/aging.205381)
Supplement: Supplementary Figures [file aging-16-205381-s001.pdf]

## SUPPLEMENTARY FIGURES

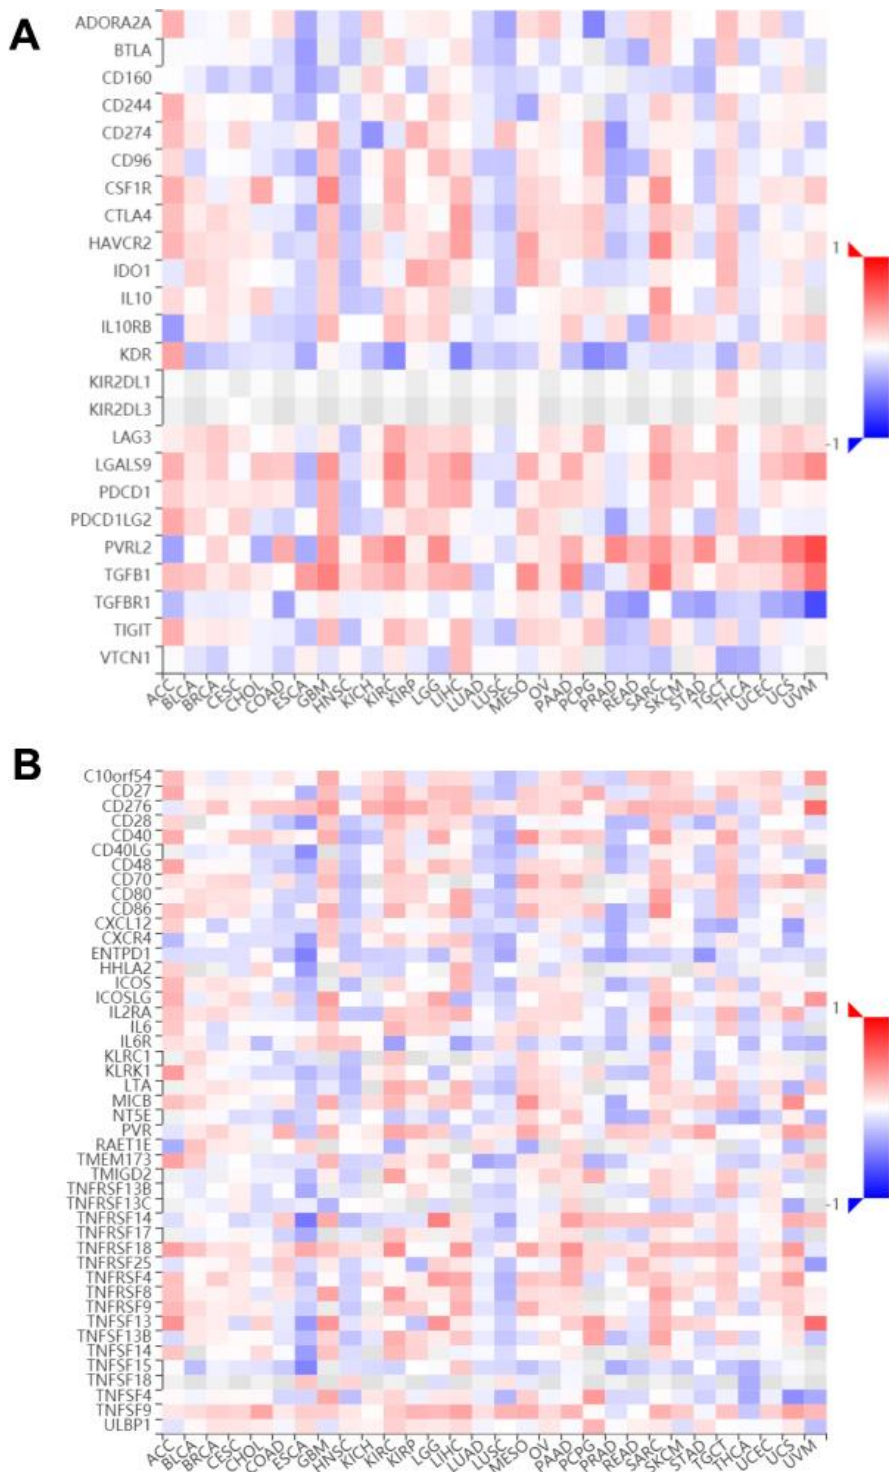

**Supplementary Figure 1. The relationship between G6PD expression and pan cancer immunomodulators.** (A) The relationship between G6PD expression and pan-cancer immunoinhibitor. (B) The relationship between G6PD expression and pan-cancer immunostimulator.

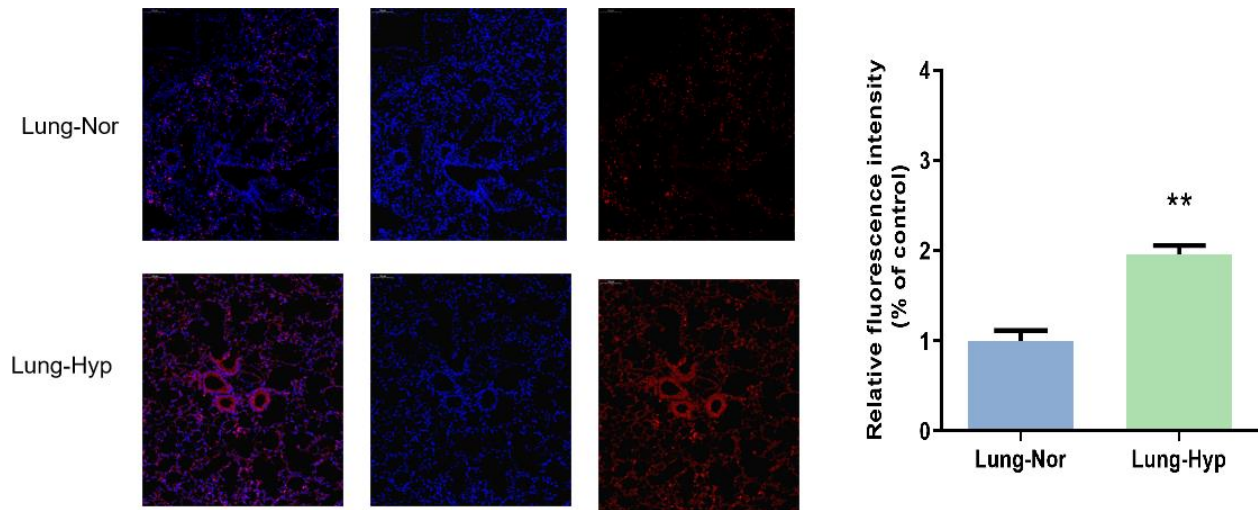

**Supplementary Figure 2.** The expression of G6PD in hypoxia-induced PAH tissues and normal lung tissue of mice through immunofluorescence imaging (n = 3).

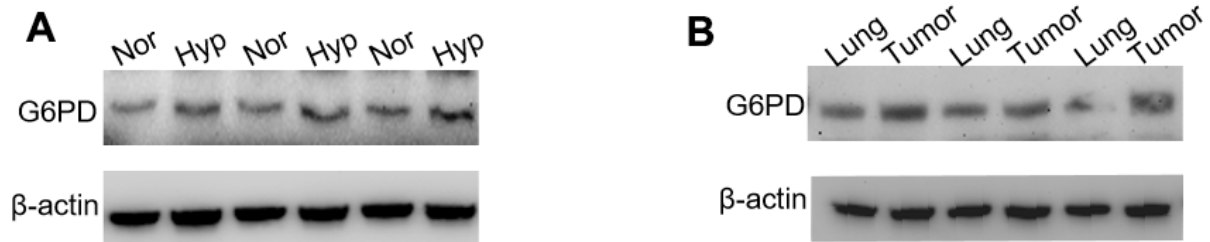

**Supplementary Figure 3.** The expression of G6PD in hypoxia-induced PAH tissues and normal lung tissue through WB analysis. (A) the levels of G6PD increased in tumor tissues than in lung tissue. (B) the levels of G6PD increased in hypoxia-induced PAH tissues than in normal lung tissue.
